# Supplementary material
Source: publisher figshare collection journal article supplement (https://tandf.figshare.com/articles/dataset/_/15124113)
Supplement: Supplementary file 1 [file 1]

Supplementary Figure 3. K-M Curve for Progression Free Survival from 1L Treatment Initiation for Patients with GBM by MGMT Testing Status and MGMT Methylation Status and Prior Steroid Use **1**

(a) K-M Curve for Progression Free Survival from 1L Treatment Initiation for Not tested/Indeterminate Patients with GBM by Prior Steroid Use

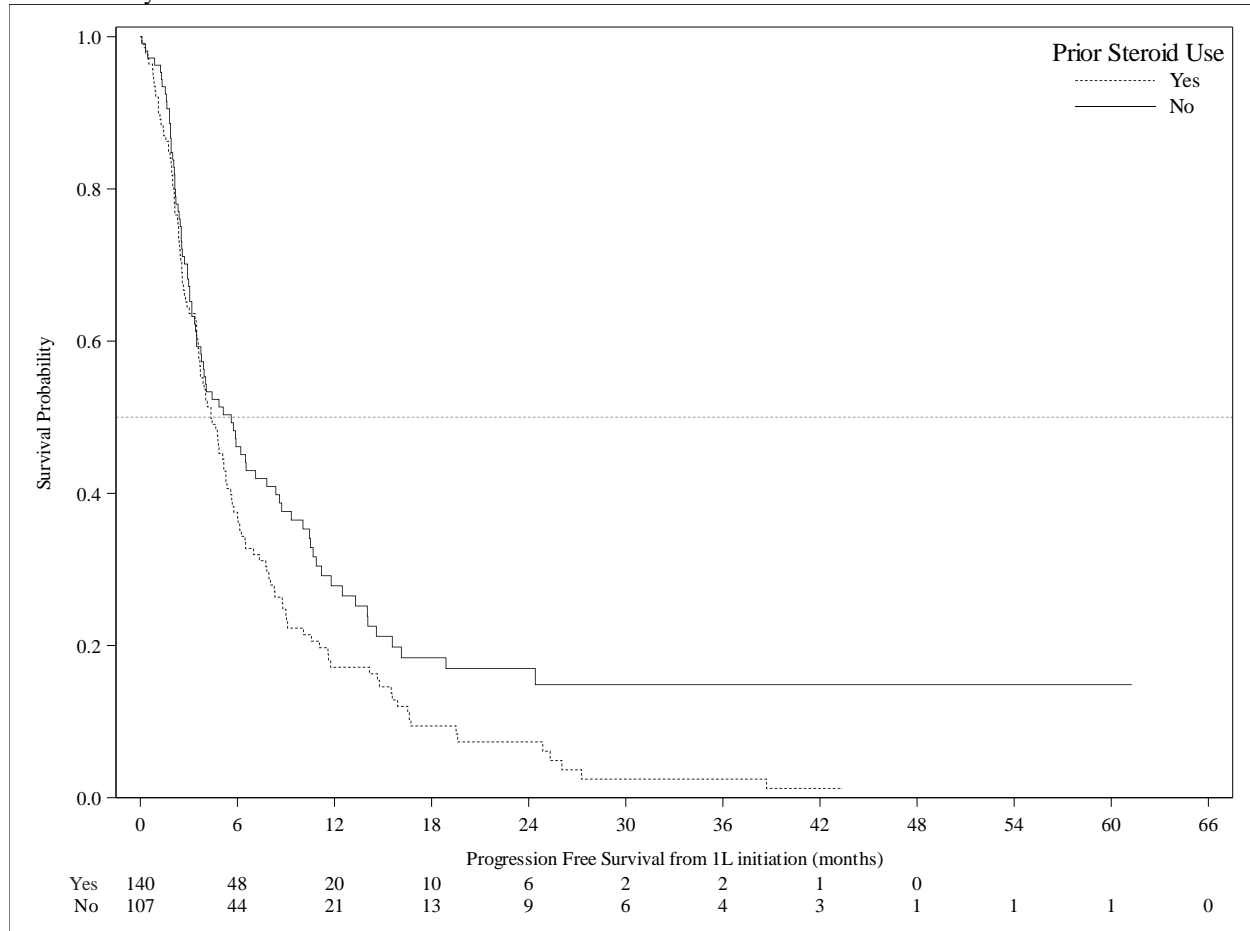

(b) K-M Estimates Progression Free Survival from 1L Treatment Initiation for Not tested/Indeterminate Patients with GBM by Prior Steroid Use

| Variable                         | Prior Steroid Use |                |                | Log rank p-value |
|----------------------------------|-------------------|----------------|----------------|------------------|
|                                  | Overall           | Yes            | No             |                  |
| N                                | 247               | 140            | 107            | <b>0.0218</b>    |
| Events (%)                       | 204 (82.6)        | 124 (88.6)     | 80 (74.8)      |                  |
| Mean (SE)                        | 8.9 (0.7)         | 7.4 (0.7)      | 9.0 (0.8)      |                  |
| Median (95% CI)                  | 4.8 (3.7, 5.7)    | 4.4 (3.6, 5.3) | 5.6 (3.5, 8.4) |                  |
| Q1, Q3                           | 2.4, 10.9         | 2.4, 8.8       | 2.5, 14.0      |                  |
| Survival probability, % (95% CI) |                   |                |                |                  |

| Variable  | Prior Steroid Use |                   |                   | Log rank p-value |
|-----------|-------------------|-------------------|-------------------|------------------|
|           | Overall           | Yes               | No                |                  |
| 6 months  | 41.2 (34.9, 47.5) | 37.5 (29.3, 45.7) | 46.1 (36.2, 55.5) |                  |
| 12 months | 21.7 (16.5, 27.4) | 17.1 (11.1, 24.3) | 27.8 (19.1, 37.2) |                  |
| 18 months | 13.1 (8.9, 18.2)  | 9.4 (5.1, 15.4)   | 18.4 (10.9, 27.4) |                  |
| 24 months | 11.3 (7.4, 16.2)  | 7.3 (3.5, 13.1)   | 17.0 (9.8, 25.8)  |                  |
| 30 months | 7.3 (3.9, 12.0)   | 2.4 (0.5, 7.4)    | 14.9 (7.9, 23.9)  |                  |
| 36 months | 7.3 (3.9, 12.0)   | 2.4 (0.5, 7.4)    | 14.9 (7.9, 23.9)  |                  |
| 42 months | 6.1 (2.9, 10.9)   | 1.2 (0.1, 5.7)    | 14.9 (7.9, 23.9)  |                  |
| 48 months | 6.1 (2.9, 10.9)   | NA                | 14.9 (7.9, 23.9)  |                  |
| 54 months | 6.1 (2.9, 10.9)   | NA                | 14.9 (7.9, 23.9)  |                  |
| 60 months | 6.1 (2.9, 10.9)   | NA                | 14.9 (7.9, 23.9)  |                  |

(c) K-M Curve for Progression Free Survival from 1L Treatment Initiation for Methylated Patients with GBM by Prior Steroid Use

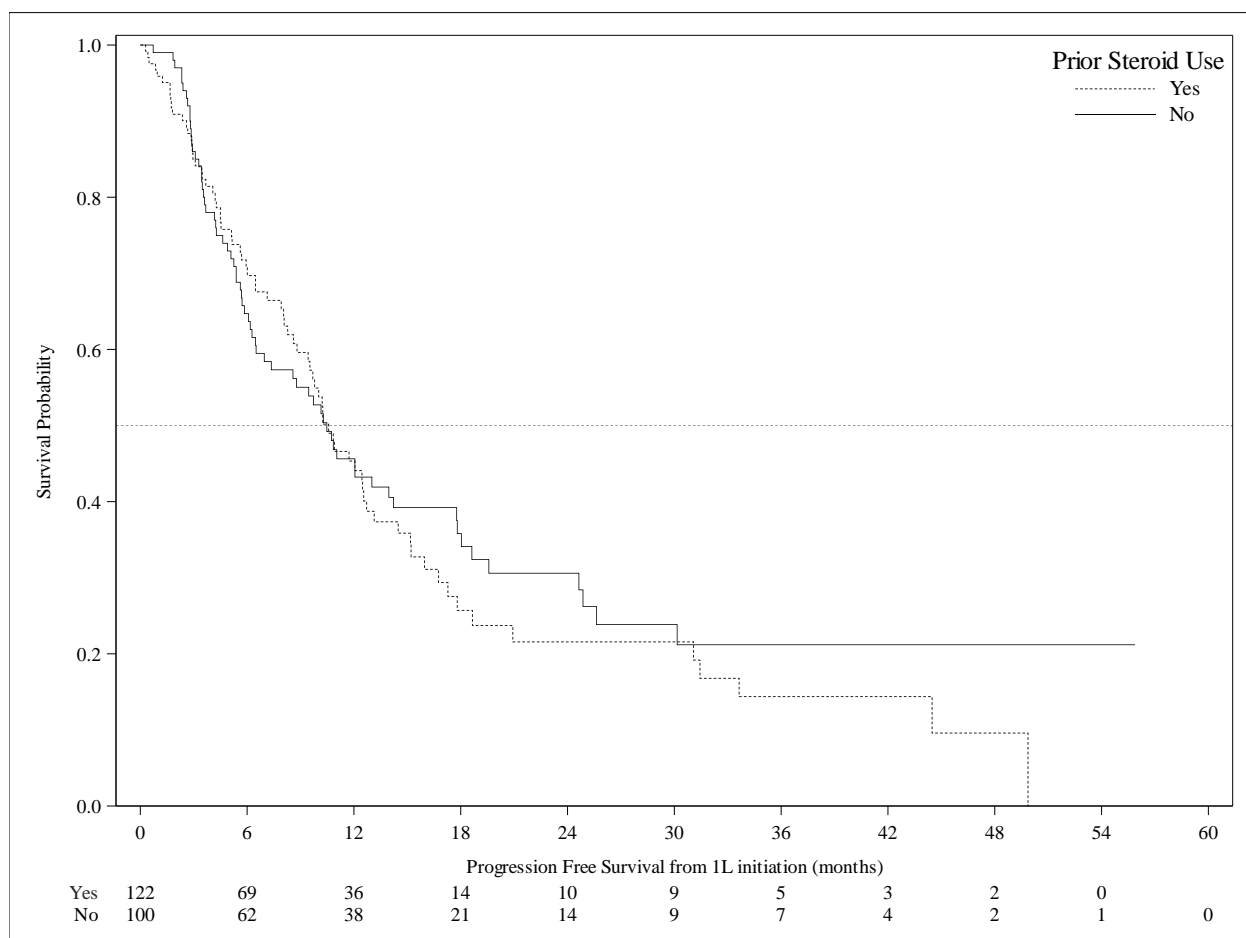

(d) K-M Estimates Progression Free Survival from 1L Treatment Initiation for Methylated Patients with GBM by Prior Steroid Use

| Variable                         | Prior Steroid Use |                   |                   | Log rank p-value |
|----------------------------------|-------------------|-------------------|-------------------|------------------|
|                                  | Overall           | Yes               | No                |                  |
| N                                | 222               | 122               | 100               | 0.5309           |
| Events (%)                       | 141 (63.5)        | 75 (61.5)         | 66 (66.0)         |                  |
| Mean (SE)                        | 17.3 (1.4)        | 16.2 (1.8)        | 14.3 (1.2)        |                  |
| Median (95% CI)                  | 10.5 (9.4, 12.5)  | 10.6 (8.8, 12.7)  | 10.5 (6.5, 14.2)  |                  |
| Q1, Q3                           | 4.6, 24.9         | 5.1, 18.7         | 4.3, 25.6         |                  |
| Survival probability, % (95% CI) |                   |                   |                   |                  |
| 6 months                         | 67.8 (61.0, 73.6) | 70.7 (61.3, 78.3) | 64.7 (54.4, 73.2) |                  |
| 12 months                        | 45.5 (38.2, 52.5) | 45.3 (35.0, 55.1) | 45.6 (35.3, 55.4) |                  |
| 18 months                        | 31.0 (23.9, 38.3) | 25.7 (16.3, 36.1) | 35.8 (25.7, 46.0) |                  |
| 24 months                        | 26.3 (19.4, 33.8) | 21.6 (12.6, 32.1) | 30.6 (20.7, 41.1) |                  |
| 30 months                        | 23.0 (16.2, 30.5) | 21.6 (12.6, 32.1) | 23.8 (14.2, 34.9) |                  |
| 36 months                        | 17.7 (11.2, 25.4) | 14.4 (6.6, 25.0)  | 21.2 (11.8, 32.5) |                  |
| 42 months                        | 17.7 (11.2, 25.4) | 14.4 (6.6, 25.0)  | 21.2 (11.8, 32.5) |                  |
| 48 months                        | 15.2 (8.5, 23.7)  | 9.6 (2.6, 22.1)   | 21.2 (11.8, 32.5) |                  |
| 54 months                        | 10.1 (3.1, 22.0)  | NA                | 21.2 (11.8, 32.5) |                  |

(e) K-M Curve for Progression Free Survival from 1L Treatment Initiation for Unmethylated Patients with GBM by Prior Steroid Use

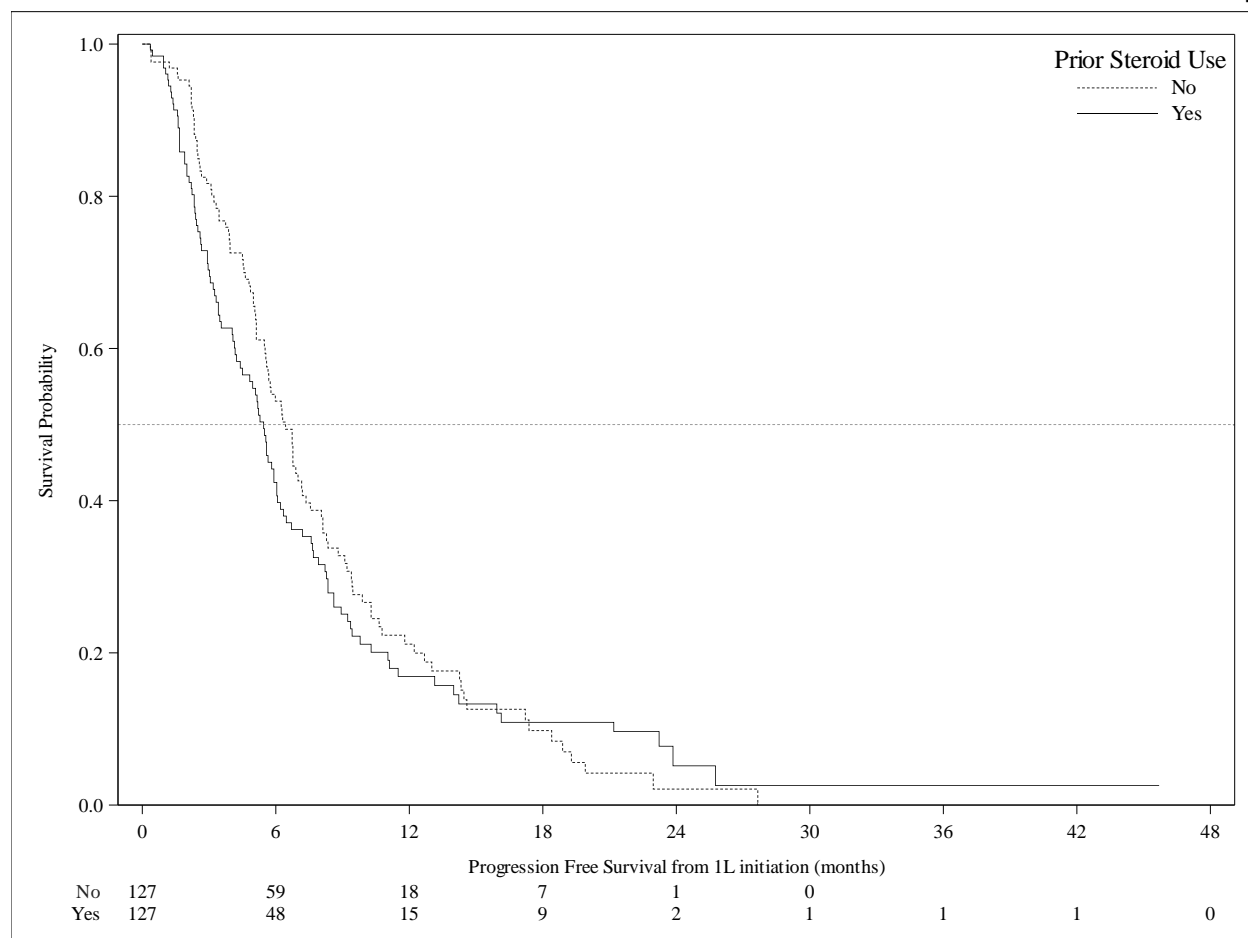

(f) K-M Estimates Progression Free Survival from 1L Treatment Initiation for Unmethylated Patients with GBM by Prior Steroid Use

| Variable                         | Prior Steroid Use |                   |                   | Log rank p-value |
|----------------------------------|-------------------|-------------------|-------------------|------------------|
|                                  | Overall           | Yes               | No                |                  |
| N                                | 254               | 127               | 127               | 0.3662           |
| Events (%)                       | 208 (81.9)        | 105 (82.7)        | 103 (81.1)        |                  |
| Mean (SE)                        | 7.9 (0.5)         | 7.5 (0.7)         | 8.1 (0.6)         |                  |
| Median (95% CI)                  | 5.8 (5.2, 6.4)    | 5.5 (4.2, 6.0)    | 6.4 (5.5, 7.2)    |                  |
| Q1, Q3                           | 3.1, 9.5          | 2.6, 9.2          | 3.9, 10.3         |                  |
| Survival probability, % (95% CI) |                   |                   |                   |                  |
| 6 months                         | 47.8 (41.2, 54.0) | 42.4 (33.4, 51.1) | 53.1 (43.7, 61.6) |                  |

| Prior Steroid Use |                   |                   |                   |                  |
|-------------------|-------------------|-------------------|-------------------|------------------|
| Variable          | Overall           | Yes               | No                | Log rank p-value |
| 12 months         | 19.0 (14.0, 24.7) | 16.9 (10.5, 24.6) | 21.1 (13.8, 29.5) |                  |
| 18 months         | 10.4 (6.5, 15.4)  | 10.9 (5.6, 18.0)  | 9.8 (4.7, 17.2)   |                  |
| 24 months         | 3.8 (1.3, 8.4)    | 5.2 (1.4, 12.9)   | 2.1 (0.2, 8.6)    |                  |
| 30 months         | 1.3 (0.1, 5.7)    | 2.6 (0.3, 10.5)   | NA                |                  |
| 36 months         | 1.3 (0.1, 5.7)    | 2.6 (0.3, 10.5)   | NA                |                  |
| 42 months         | 1.3 (0.1, 5.7)    | 2.6 (0.3, 10.5)   | NA                |                  |
