# Supplementary material
Source: publisher figshare collection journal article supplement (https://tandf.figshare.com/articles/dataset/_/15124113)
Supplement: Supplementary file 2 [file 1]

**Supplementary Figure 1.** Kaplan-Meier curves and estimates for duration of treatment (a) by testing status (b) by methylation status

(a)

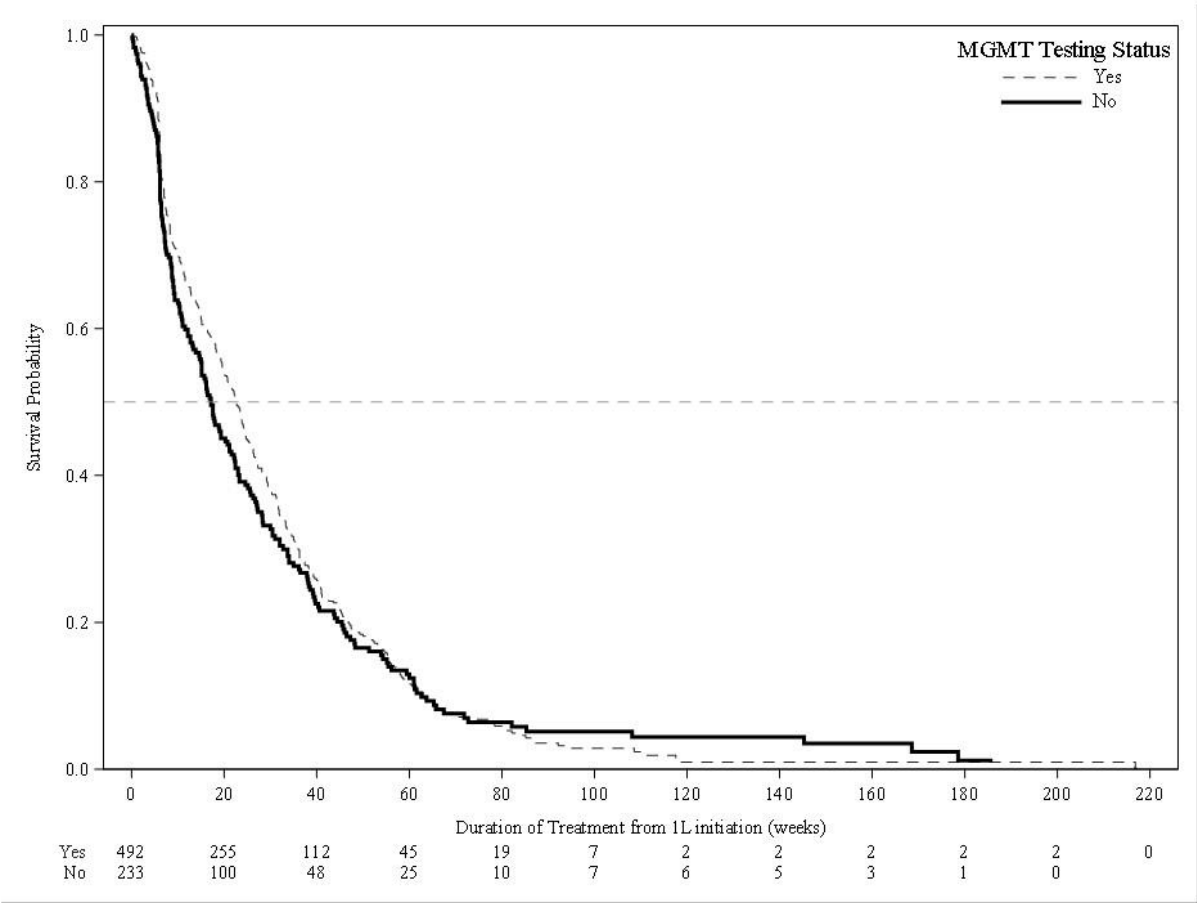

| MGMT Testing Status |            |            |            |                  |
|---------------------|------------|------------|------------|------------------|
| Variable            | Overall    | No         | Yes        | Log rank p-value |
| N                   | 725        | 233        | 492        | 0.3697           |
| Events, n (%)       | 655 (90.3) | 211 (90.6) | 444 (90.2) |                  |
| Mean (SE), weeks    | 30.2 (1.4) | 29.6 (2.6) | 30.0 (1.5) |                  |

| MGMT Testing Status       |                   |                      |                   |                  |
|---------------------------|-------------------|----------------------|-------------------|------------------|
| Variable                  | Overall           | No                   | Yes               | Log rank p-value |
| Median (95% CI),<br>weeks | 20.9 (18.3, 23.0) | 17.1 (14.6, 21.1)    | 22.7 (19.7, 24.4) |                  |
| Survival<br>probability,  |                   |                      |                   |                  |
| 20 weeks                  | 51.2 (47.4, 54.8) | 45.1 (38.5, 51.4)    | 54.0 (49.5, 58.3) |                  |
| 40 weeks                  | 24.7 (21.5, 28.0) | 22.5 (17.2,<br>28.2) | 25.7 (21.7, 29.7) |                  |
| 60 weeks                  | 12.0 (9.6, 14.7)  | 12.4 (8.3, 17.3)     | 11.8 (8.9, 15.0)  |                  |
| 80 weeks                  | 5.8 (4.1, 8.0)    | 6.4 (3.5, 10.5)      | 5.5 (3.5, 8.2)    |                  |
| 100 weeks                 | 3.6 (2.2, 5.5)    | 5.1 (2.6, 9.0)       | 2.8 (1.4, 5.1)    |                  |
| 120 weeks                 | 2.2 (1.1, 3.9)    | 4.4 (2.0, 8.2)       | 0.9 (0.2, 2.9)    |                  |
| 140 weeks                 | 2.2 (1.1, 3.9)    | 4.4 (2.0, 8.2)       | 0.9 (0.2, 2.9)    |                  |
| 160 weeks                 | 1.9 (0.9, 3.6)    | 3.5 (1.4, 7.3)       | 0.9 (0.2, 2.9)    |                  |
| 180 weeks                 | 1.1 (0.4, 2.8)    | 1.2 (0.1, 5.1)       | 0.9 (0.2, 2.9)    |                  |
| 200 weeks                 | 1.1 (0.4, 2.8)    | NA                   | 0.9 (0.2, 2.9)    |                  |

Abbreviations: CI, confidence interval; MGMT, O-methylguanine-DNA methyltransferase; NA, not available;  
SE, standard error

(b)

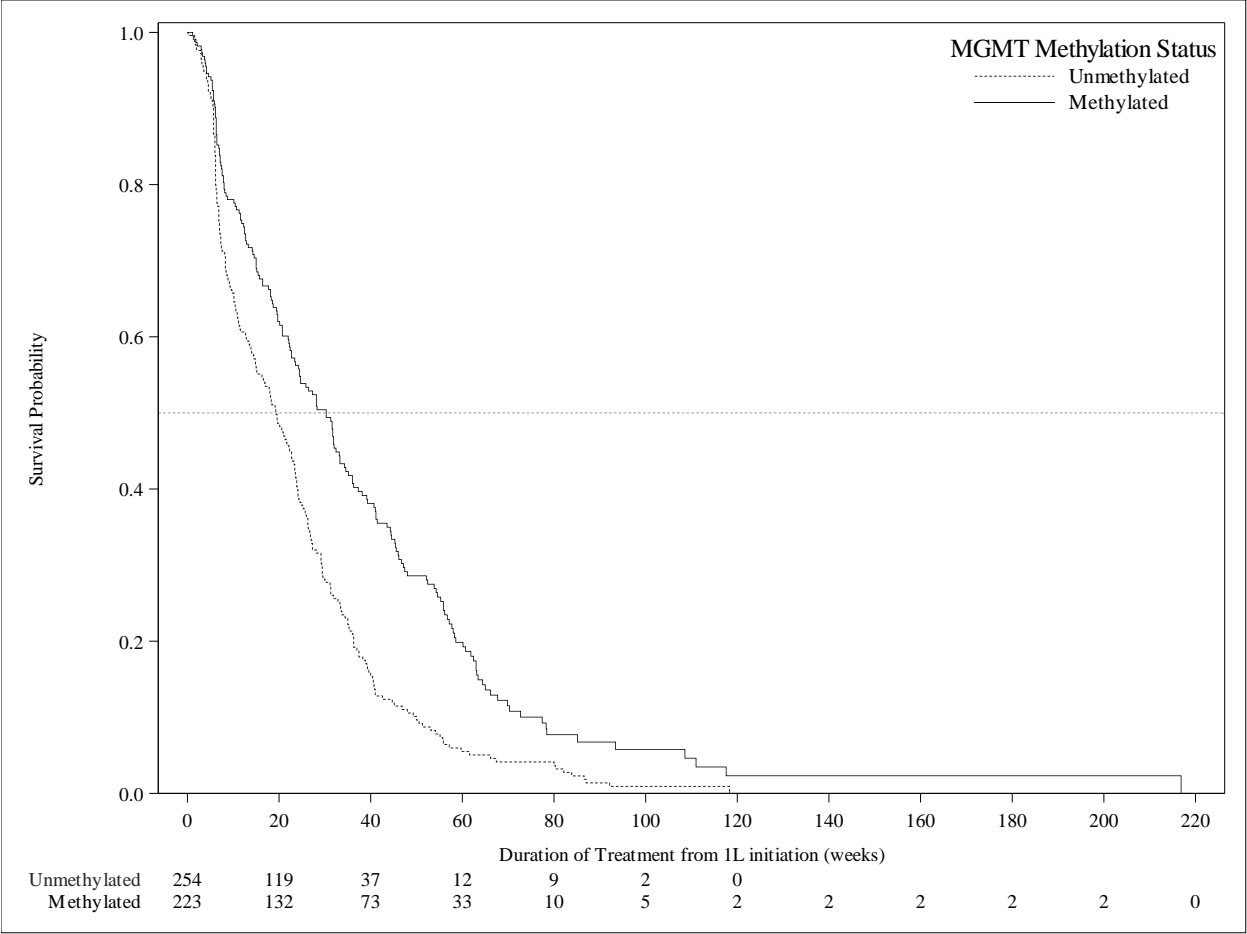

| MGMT Methylation Status |                   |                   |                   | Log rank p-value |
|-------------------------|-------------------|-------------------|-------------------|------------------|
| Variable                | Overall           | Unmethylated      | Methylated        |                  |
| N                       | 477               | 254               | 223               | <0.0001          |
| Events, n (%)           | 431 (90.4)        | 242 (95.3)        | 189 (84.8)        |                  |
| Mean (SE), weeks        | 30.4 (1.5)        | 23.7 (1.3)        | 38.6 (3.0)        |                  |
| Median (95% CI), weeks  | 23.0 (20.1, 24.7) | 19.3 (14.9, 23.0) | 30.3 (23.4, 33.3) |                  |

| MGMT Methylation Status |                   |                   |                   | Log rank p-value |
|-------------------------|-------------------|-------------------|-------------------|------------------|
| Variable                | Overall           | Unmethylated      | Methylated        |                  |
| Survival probability, % |                   |                   |                   |                  |
| 20 weeks                | 54.9 (50.3, 59.2) | 48.6 (42.3, 54.6) | 62.0 (55.2, 68.0) |                  |
| 40 weeks                | 25.8 (21.8, 30.0) | 15.4 (11.1, 20.2) | 38.1 (31.5, 44.7) |                  |
| 60 weeks                | 12.1 (9.1, 15.4)  | 5.5 (3.0, 9.0)    | 19.9 (14.5, 25.8) |                  |
| 80 weeks                | 5.7 (3.6, 8.4)    | 3.7 (1.7, 6.7)    | 7.7 (4.2, 12.6)   |                  |
| 100 weeks               | 2.9 (1.4, 5.2)    | 0.9 (0.2, 3.0)    | 5.8 (2.7, 10.6)   |                  |
| 120 weeks               | 1.0 (0.2, 3.0)    | NA                | 2.3 (0.5, 6.8)    |                  |
| 140 weeks               | 1.0 (0.2, 3.0)    | NA                | 2.3 (0.5, 6.8)    |                  |
| 160 weeks               | 1.0 (0.2, 3.0)    | NA                | 2.3 (0.5, 6.8)    |                  |
| 180 weeks               | 1.0 (0.2, 3.0)    | NA                | 2.3 (0.5, 6.8)    |                  |
| 200 weeks               | 1.0 (0.2, 3.0)    | NA                | 2.3 (0.5, 6.8)    |                  |

Abbreviations: CI, confidence interval; MGMT, O-methylguanine-DNA methyltransferase; NA, not available;

SE, standard error
