# Supplementary material
Source: publisher figshare collection journal article supplement (https://tandf.figshare.com/articles/dataset/_/15124113)
Supplement: Supplementary file 3 [file 1]

Supplementary Figure 2. K-M Curves and Estimates for Overall Survival from 1L Treatment Initiation for Patients with GBM by MGMT Testing Status and MGMT Methylation Status and Prior Steroid Use

(a) K-M Curve for Overall Survival from 1L Treatment Initiation for Not tested/Indeterminate Patients with GBM by Prior Steroid Use

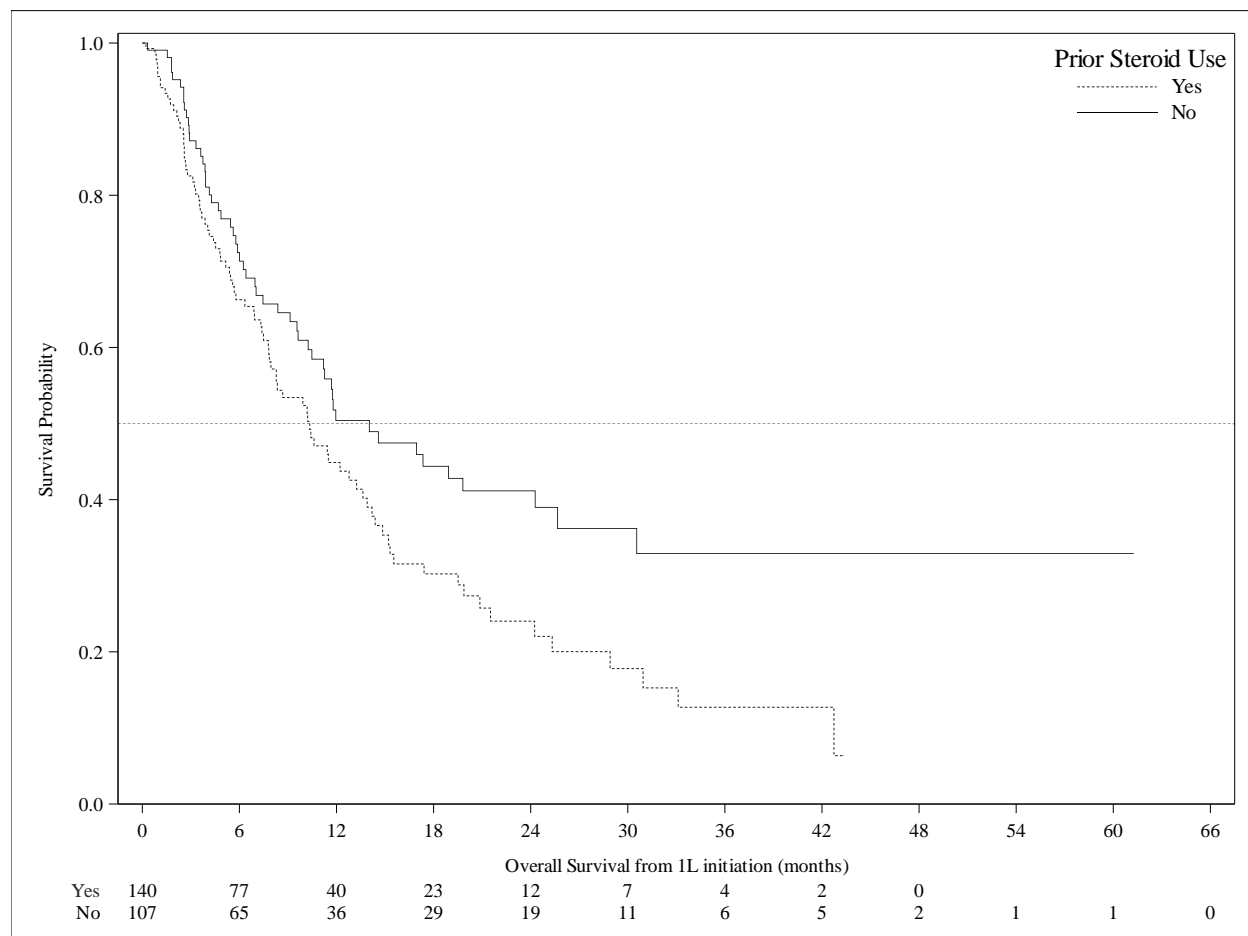

(b) K-M Estimates Overall Survival from 1L Treatment Initiation for Not tested/Indeterminate Patients with GBM by Prior Steroid Use

| Variable        | Prior Steroid Use |                  |                   | Log rank p-value |
|-----------------|-------------------|------------------|-------------------|------------------|
|                 | Overall           | Yes              | No                |                  |
| N               | 247               | 140              | 107               | <b>0.0158</b>    |
| Events (%)      | 141 (57.1)        | 87 (62.1)        | 54 (50.5)         |                  |
| Mean (SE)       | 17.6 (1.2)        | 15.0 (1.4)       | 16.9 (1.3)        |                  |
| Median (95% CI) | 11.5 (9.6, 14.2)  | 10.3 (7.8, 13.6) | 14.0 (10.2, 24.3) |                  |
| Q1, Q3          | 4.8, 30.6         | 4.1, 21.5        | 5.6, NR           |                  |

| Variable                         | Prior Steroid Use |                   |                   | Log rank p-value |
|----------------------------------|-------------------|-------------------|-------------------|------------------|
|                                  | Overall           | Yes               | No                |                  |
| Survival probability, % (95% CI) |                   |                   |                   |                  |
| 6 months                         | 69.0 (62.5, 74.6) | 66.3 (57.3, 73.8) | 72.5 (62.4, 80.2) |                  |
| 12 months                        | 47.4 (40.2, 54.2) | 44.9 (35.4, 53.9) | 50.4 (39.4, 60.4) |                  |
| 18 months                        | 36.6 (29.6, 43.7) | 30.2 (21.3, 39.6) | 44.4 (33.4, 54.8) |                  |
| 24 months                        | 31.8 (24.8, 39.0) | 24.0 (15.5, 33.6) | 41.2 (30.2, 51.8) |                  |
| 30 months                        | 26.1 (19.0, 33.7) | 17.8 (9.8, 27.7)  | 36.2 (24.8, 47.7) |                  |
| 36 months                        | 21.5 (14.3, 29.7) | 12.7 (5.6, 22.9)  | 32.9 (21.2, 45.1) |                  |
| 42 months                        | 21.5 (14.3, 29.7) | 12.7 (5.6, 22.9)  | 32.9 (21.2, 45.1) |                  |
| 48 months                        | 17.9 (9.9, 27.8)  | NA                | 32.9 (21.2, 45.1) |                  |
| 54 months                        | 17.9 (9.9, 27.8)  | NA                | 32.9 (21.2, 45.1) |                  |
| 60 months                        | 17.9 (9.9, 27.8)  | NA                | 32.9 (21.2, 45.1) |                  |

(c). K-M Curve for Overall Survival from 1L Treatment Initiation for Methylated Patients with GBM by Prior Steroid Use

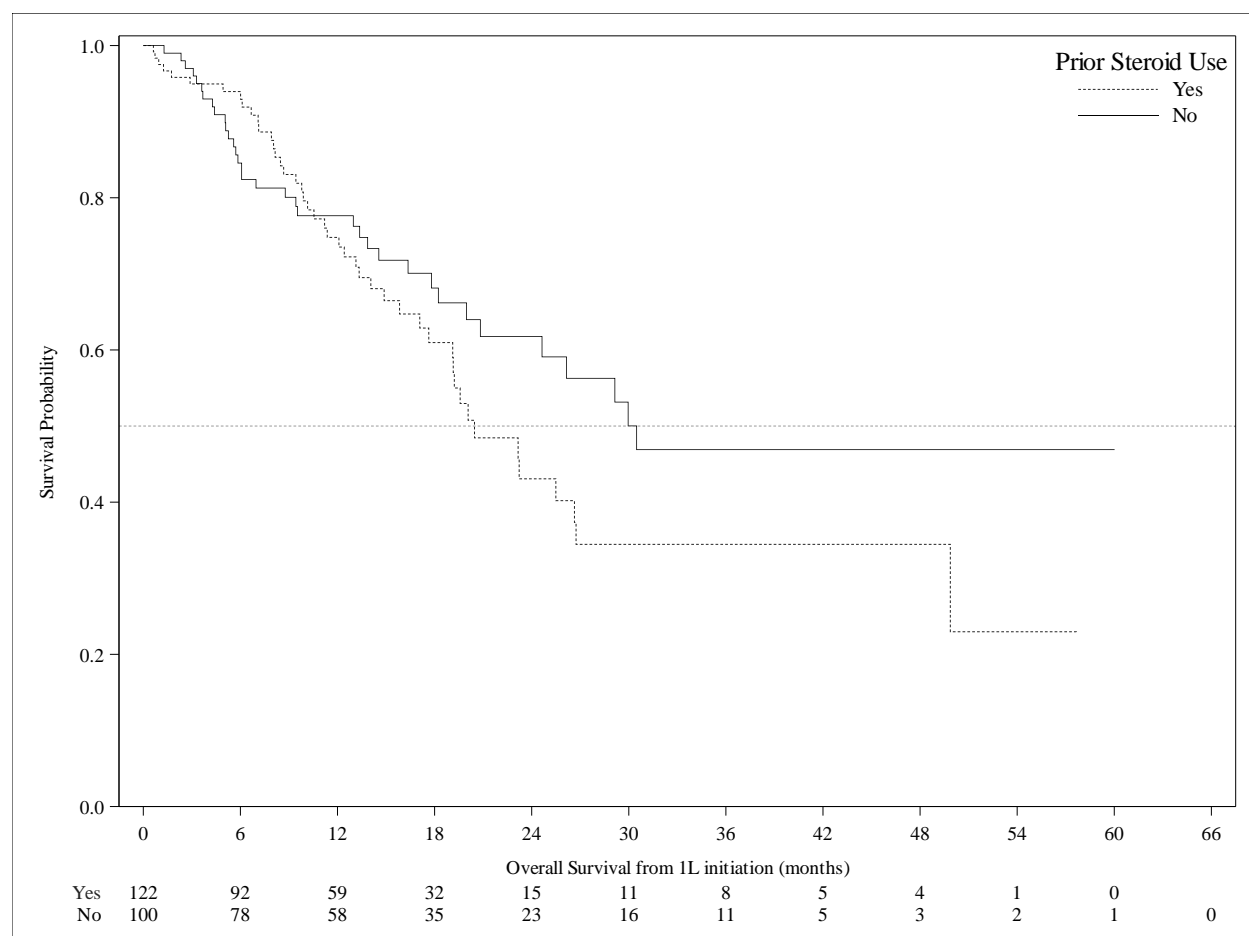

(d) K-M Estimates Overall Survival from 1L Treatment Initiation for Methylated Patients with GBM by Prior Steroid Use

| Variable                         | Prior Steroid Use |                   |                   | Log rank p-value |
|----------------------------------|-------------------|-------------------|-------------------|------------------|
|                                  | Overall           | Yes               | No                |                  |
| N                                | 222               | 122               | 100               | 0.2447           |
| Events (%)                       | 80 (36.0)         | 45 (36.9)         | 35 (35.0)         |                  |
| Mean (SE)                        | 29.2 (1.7)        | 27.0 (2.3)        | 22.4 (1.2)        |                  |
| Median (95% CI)                  | 25.5 (20.0, 49.9) | 20.5 (17.6, 26.7) | 30.5 (20.8, NR)   |                  |
| Q1, Q3                           | 12.4, NR          | 11.4, 49.9        | 13.4, NR          |                  |
| Survival probability, % (95% CI) |                   |                   |                   |                  |
| 6 months                         | 89.4 (84.3, 92.9) | 94.0 (87.7, 97.1) | 84.6 (75.7, 90.4) |                  |
| 12 months                        | 76.1 (69.3, 81.7) | 74.8 (64.6, 82.4) | 77.6 (67.7, 84.8) |                  |
| 18 months                        | 64.4 (56.3, 71.5) | 61.0 (49.0, 70.9) | 68.1 (56.5, 77.2) |                  |
| 24 months                        | 52.3 (43.0, 60.8) | 43.1 (29.8, 55.7) | 61.8 (49.1, 72.2) |                  |
| 30 months                        | 42.2 (32.2, 51.8) | 34.5 (21.3, 48.0) | 50.0 (35.4, 63.0) |                  |
| 36 months                        | 40.6 (30.6, 50.4) | 34.5 (21.3, 48.0) | 46.9 (32.1, 60.4) |                  |
| 42 months                        | 40.6 (30.6, 50.4) | 34.5 (21.3, 48.0) | 46.9 (32.1, 60.4) |                  |
| 48 months                        | 40.6 (30.6, 50.4) | 34.5 (21.3, 48.0) | 46.9 (32.1, 60.4) |                  |
| 54 months                        | 33.9 (19.8, 48.4) | 23.0 (6.7, 44.9)  | 46.9 (32.1, 60.4) |                  |
| 60 months                        | 33.9 (19.8, 48.4) | NA                | 46.9 (32.1, 60.4) |                  |

(e) K-M Curve for Overall Survival from 1L Treatment Initiation for Unmethylated Patients with GBM by Prior Steroid Use

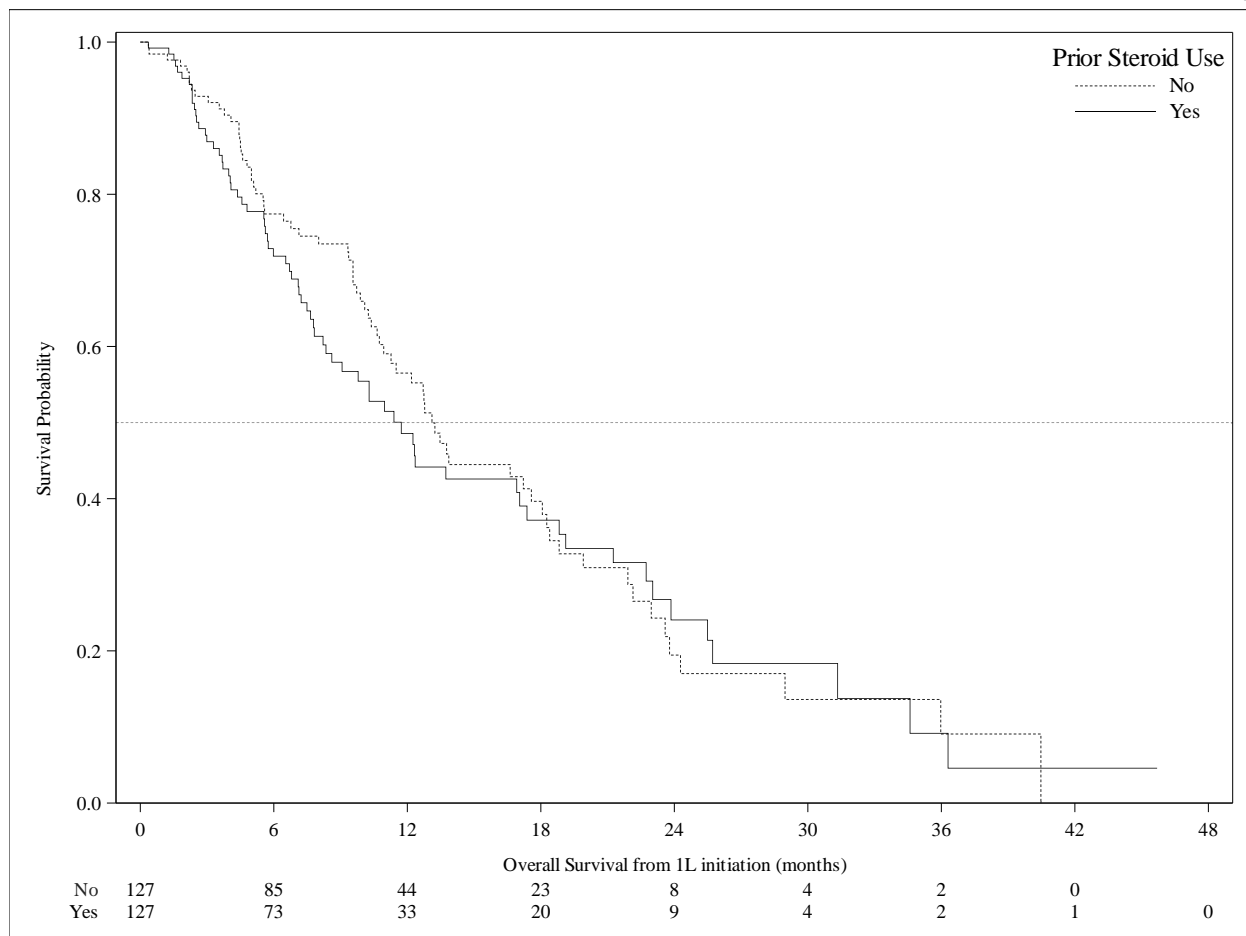

(f) K-M Estimates Overall Survival from 1L Treatment Initiation for Unmethylated Patients with GBM by Prior Steroid Use

| Variable                         | Prior Steroid Use |                   |                   | Log rank p-value |
|----------------------------------|-------------------|-------------------|-------------------|------------------|
|                                  | Overall           | Yes               | No                |                  |
| N                                | 254               | 127               | 127               | 0.5038           |
| Events (%)                       | 142 (55.9)        | 70 (55.1)         | 72 (56.7)         |                  |
| Mean (SE)                        | 16.0 (1.0)        | 15.4 (1.3)        | 16.4 (1.3)        |                  |
| Median (95% CI)                  | 12.4 (10.6, 16.6) | 11.7 (8.3, 17.0)  | 13.1 (10.9, 18.1) |                  |
| Q1, Q3                           | 6.0, 23.6         | 5.6, 23.9         | 7.1, 23.0         |                  |
| Survival probability, % (95% CI) |                   |                   |                   |                  |
| 6 months                         | 74.7 (68.5, 79.8) | 71.9 (62.5, 79.3) | 77.4 (68.8, 83.9) |                  |
| 12 months                        | 52.6 (45.3, 59.4) | 48.6 (38.0, 58.3) | 56.5 (46.1, 65.6) |                  |
| 18 months                        | 38.4 (30.8, 45.9) | 37.2 (26.5, 47.9) | 39.6 (29.1, 50.0) |                  |

| Prior Steroid Use |                   |                   |                   |                  |
|-------------------|-------------------|-------------------|-------------------|------------------|
| Variable          | Overall           | Yes               | No                | Log rank p-value |
| 24 months         | 21.8 (14.7, 29.8) | 24.1 (13.9, 35.8) | 19.4 (10.3, 30.8) |                  |
| 30 months         | 15.9 (9.3, 24.1)  | 18.3 (8.9, 30.4)  | 13.6 (5.5, 25.3)  |                  |
| 36 months         | 9.5 (3.9, 18.2)   | 9.2 (2.1, 22.8)   | 9.1 (2.3, 21.8)   |                  |
| 42 months         | 3.6 (0.4, 13.4)   | 4.6 (0.4, 17.9)   | NA                |                  |
